# Supplementary material for: Changes in weekend and weekday care quality of emergency medical admissions to 20 hospitals in England during implementation of the 7-day services national health policy
Source: PubMed Central journal article supplement (PMC8237174; doi:10.1136/bmjqs-2020-011165), 2020-10-28

## APPENDIX 2 - ELECTRONIC SUPPLEMENTARY MATERIAL (ESM)

**ESM Table 1:** Status of 20 participating Trusts in 2014

| Trust | Size (number of beds, range) | Quintile (based on number of beds) | Specialist hours per 10 Emergency Admissions* |
|-------|------------------------------|------------------------------------|-----------------------------------------------|
| 1     | 986-2037                     | 5                                  | 40.2                                          |
| 2     |                              |                                    | 34.1                                          |
| 3     |                              |                                    | 15.5                                          |
| 4     |                              |                                    | 10.7                                          |
| 5     | 787-984                      | 4                                  | 38.9                                          |
| 6     |                              |                                    | 36.1                                          |
| 7     |                              |                                    | 18.5                                          |
| 8     |                              |                                    | 15.4                                          |
| 9     | 636-783                      | 3                                  | 50.7                                          |
| 10    |                              |                                    | 35.7                                          |
| 11    |                              |                                    | 11.4                                          |
| 12    |                              |                                    | 8.1                                           |
| 13    | 479-627                      | 2                                  | 47.0                                          |
| 14    |                              |                                    | 38.0                                          |
| 15    |                              |                                    | 9.6                                           |
| 16    |                              |                                    | 7.0                                           |
| 17    | 240-470                      | 1                                  | 38.6                                          |
| 18    |                              |                                    | 34.7                                          |
| 19    |                              |                                    | 11.1                                          |
| 20    |                              |                                    | 8.8                                           |

\*Adjusted using the formulae  $N \times (1 / \text{Response Rate})$  and rounded to the nearest integer

**ESM Table 2: Characteristics of study population versus background population**

|                                                          | Case Notes Review data |        |      |        |      |        | All trusts/hospitals data* |        |         |        |         |        |
|----------------------------------------------------------|------------------------|--------|------|--------|------|--------|----------------------------|--------|---------|--------|---------|--------|
|                                                          | Total                  |        | W/E  |        | W/D  |        | Total                      |        | W/E     |        | W/D     |        |
|                                                          | n                      | %      | n    | %      | n    | %      | n                          | %      | n       | %      | n       | %      |
| <b>Total</b>                                             | 4000                   |        | 2000 |        | 2000 |        | 5818430                    |        | 1411394 |        | 4407036 |        |
| <b>Age</b>                                               |                        |        |      |        |      |        |                            |        |         |        |         |        |
| Mean (SD)                                                | 61.1                   | 22.310 | 61.7 | 22.379 | 60.5 | 22.271 | 61                         | 22.350 | 61      | 22.780 | 61      | 22.190 |
| Median (IQR)                                             | 65                     | 43-81  | 66   | 44-81  | 64   | 42-80  | 65                         | 43-80  | 66      | 43-81  | 65      | 43-80  |
| <b>Gender</b>                                            |                        |        |      |        |      |        |                            |        |         |        |         |        |
| Male                                                     | 1869                   | 46.7   | 938  | 46.9   | 931  | 46.6   | 2639489                    | 45.4   | 645166  | 45.7   | 1994323 | 45.3   |
| Female                                                   | 2131                   | 53.3   | 1062 | 53.1   | 1069 | 53.5   | 3178941                    | 54.6   | 766228  | 54.3   | 2412713 | 54.7   |
| <b>Ethnicity</b>                                         |                        |        |      |        |      |        |                            |        |         |        |         |        |
| Caucasian                                                | 3140                   | 78.5   | 1584 | 79.2   | 1556 | 77.8   | 4918775                    | 84.5   | 1191464 | 84.4   | 3727311 | 84.6   |
| Non_Caucasian                                            | 818                    | 20.5   | 396  | 19.8   | 422  | 21.1   | 526384                     | 9.0    | 128736  | 9.1    | 397648  | 9.0    |
| Unknown                                                  | 42                     | 1.1    | 20   | 1.0    | 22   | 1.1    | 373271                     | 6.4    | 91194   | 6.5    | 282077  | 6.4    |
| <b>Top 5 primary discharge diagnosis (SHMI grouping)</b> |                        |        |      |        |      |        |                            |        |         |        |         |        |
| Nonspecific chest pain                                   | 227                    | 5.7    | 116  | 5.8    | 111  | 5.6    | 326876                     | 5.6    | 72314   | 5.1    | 254562  | 5.8    |
| Pneumonia (excluding TB/STD)                             | 186                    | 4.7    | 105  | 5.3    | 81   | 4.1    | 322014                     | 5.5    | 85643   | 6.1    | 236371  | 5.4    |
| Urinary tract infections                                 | 176                    | 4.4    | 100  | 5.0    | 76   | 3.8    | 235612                     | 4.0    | 64076   | 4.5    | 171536  | 3.9    |
| Abdominal pain                                           | 156                    | 3.9    | 70   | 3.5    | 86   | 4.3    | 243013                     | 4.2    | 54697   | 3.9    | 188316  | 4.3    |
| COPD & bronchiectasis                                    | 128                    | 3.2    | 67   | 3.4    | 61   | 3.1    | 193168                     | 3.3    | 48288   | 3.4    | 144880  | 3.3    |
| <b>Other</b>                                             | 3127                   | 78.2   | 1542 | 77.1   | 1585 | 79.3   | 4497747                    | 77.3   | 1086376 | 77.0   | 3411371 | 77.4   |
| <b>Length of stay</b>                                    |                        |        |      |        |      |        |                            |        |         |        |         |        |
| median (IQR)                                             | 2                      | 0-5    | 2    | 0-5    | 1    | 0-4    | 1                          | 0-5    | 2       | 0-5    | 1       | 0-5    |
| <b>Zero length of stay</b>                               |                        |        |      |        |      |        |                            |        |         |        |         |        |
| <b>ZLOS</b>                                              | 1107                   | 27.7   | 512  | 25.6   | 595  | 29.8   | 1739129                    | 29.9   | 388274  | 27.5   | 1350757 | 30.7   |
| Not-ZLOS                                                 | 2871                   | 71.8   | 1477 | 73.9   | 1394 | 69.7   | 4078719                    | 70.1   | 1023261 | 72.5   | 3054076 | 69.3   |
| Unknown                                                  | 22                     | 0.6    | 11   | 0.6    | 11   | 0.6    | 0                          | 0.0    | 0       | 0.0    | 0       | 0.0    |
| <b>In-hospital mortality</b>                             |                        |        |      |        |      |        |                            |        |         |        |         |        |
| Died                                                     | 168                    | 4.2    | 90   | 4.5    | 78   | 3.9    | 239719                     | 4.1    | 63372   | 4.5    | 176281  | 4.0    |

\*from Hospital Episode Statistics (HES), of those trusts participating in HiSLAC speciality intensity prevalence survey from 2014 to 2018 financial years

ESM Table 3a: Reviewers' assessment on pre-admission patient pathways

|                                                                       | BOTH EPOCHS |      |             |      |             |      | EPOCH 1     |      |             |      |             |      | EPOCH 2     |      |             |      |             |      |
|-----------------------------------------------------------------------|-------------|------|-------------|------|-------------|------|-------------|------|-------------|------|-------------|------|-------------|------|-------------|------|-------------|------|
|                                                                       | Total       |      | W/E         |      | W/D         |      | Total       |      | W/E         |      | W/D         |      | Total       |      | W/E         |      | W/D         |      |
|                                                                       | n           | %    | n           | %    | n           | %    | n           | %    | n           | %    | n           | %    | n           | %    | n           | %    | n           | %    |
| <b>Total</b>                                                          | <b>4000</b> |      | <b>2000</b> |      | <b>2000</b> |      | <b>2000</b> |      | <b>1000</b> |      | <b>1000</b> |      | <b>2000</b> |      | <b>1000</b> |      | <b>1000</b> |      |
| <b>Source of admission</b>                                            |             |      |             |      |             |      |             |      |             |      |             |      |             |      |             |      |             |      |
| Own home                                                              | 3389        | 84.7 | 1711        | 85.6 | 1678        | 83.9 | 1712        | 85.6 | 865         | 86.5 | 847         | 84.7 | 1677        | 83.9 | 846         | 84.6 | 831         | 83.1 |
| Nursing or residential care home                                      | 257         | 6.4  | 121         | 6.1  | 136         | 6.8  | 127         | 6.4  | 60          | 6.0  | 67          | 6.7  | 130         | 6.5  | 61          | 6.1  | 69          | 6.9  |
| No information available                                              | 247         | 6.2  | 114         | 5.7  | 133         | 6.7  | 105         | 5.3  | 46          | 4.6  | 59          | 5.9  | 142         | 7.1  | 68          | 6.8  | 74          | 7.4  |
| Another hospital                                                      | 30          | 0.8  | 16          | 0.8  | 14          | 0.7  | 12          | 0.6  | 6           | 0.6  | 6           | 0.6  | 18          | 0.9  | 10          | 1.0  | 8           | 0.8  |
| No fixed abode                                                        | 70          | 1.8  | 34          | 1.7  | 36          | 1.8  | 41          | 2.1  | 21          | 2.1  | 20          | 2.0  | 29          | 1.5  | 13          | 1.3  | 16          | 1.6  |
| Missing                                                               | 7           | 0.2  | 4           | 0.2  | 3           | 0.2  | 3           | 0.2  | 2           | 0.2  | 1           | 0.1  | 4           | 0.2  | 2           | 0.2  | 2           | 0.2  |
| <b>Patient condition before admission</b>                             |             |      |             |      |             |      |             |      |             |      |             |      |             |      |             |      |             |      |
| Independent                                                           | 2611        | 65.3 | 1292        | 64.6 | 1319        | 66.0 | 1333        | 66.7 | 667         | 66.7 | 666         | 66.6 | 1278        | 63.9 | 625         | 62.5 | 653         | 65.3 |
| Needing help with some activities of daily living (ADLs)              | 672         | 16.8 | 332         | 16.6 | 340         | 17.0 | 351         | 17.6 | 169         | 16.9 | 182         | 18.2 | 321         | 16.1 | 163         | 16.3 | 158         | 15.8 |
| Dependant on others for most/all ADLs including personal hygiene      | 384         | 9.6  | 219         | 11.0 | 165         | 8.3  | 174         | 8.7  | 100         | 10.0 | 74          | 7.4  | 210         | 10.5 | 119         | 11.9 | 91          | 9.1  |
| Unable to determine; no relevant information in notes                 | 325         | 8.1  | 152         | 7.6  | 173         | 8.7  | 139         | 7.0  | 62          | 6.2  | 77          | 7.7  | 186         | 9.3  | 90          | 9.0  | 96          | 9.6  |
| Missing                                                               | 8           | 0.2  | 5           | 0.3  | 3           | 0.2  | 3           | 0.2  | 2           | 0.2  | 1           | 0.1  | 5           | 0.3  | 3           | 0.3  | 2           | 0.2  |
| <b>Referral to hospital mechanism</b>                                 |             |      |             |      |             |      |             |      |             |      |             |      |             |      |             |      |             |      |
| 999/ambulance transfer to ED                                          | 1873        | 46.8 | 1032        | 51.6 | 841         | 42.1 | 995         | 49.8 | 550         | 55.0 | 445         | 44.5 | 878         | 43.9 | 482         | 48.2 | 396         | 39.6 |
| Self-presentation to ED (walk-in/own transport)                       | 847         | 21.2 | 455         | 22.8 | 392         | 19.6 | 402         | 20.1 | 215         | 21.5 | 187         | 18.7 | 445         | 22.3 | 240         | 24.0 | 205         | 20.5 |
| GP or deputising service referral (documented letter or phone call)   | 559         | 14.0 | 164         | 8.2  | 395         | 19.8 | 288         | 14.4 | 88          | 8.8  | 200         | 20.0 | 271         | 13.6 | 76          | 7.6  | 195         | 19.5 |
| Unable to determine                                                   | 553         | 13.8 | 282         | 14.1 | 271         | 13.6 | 236         | 11.8 | 123         | 12.3 | 113         | 11.3 | 317         | 15.9 | 159         | 15.9 | 158         | 15.8 |
| Patient instructed by GP to attend ED, no formal evidence of referral | 93          | 2.3  | 29          | 1.5  | 64          | 3.2  | 51          | 2.6  | 16          | 1.6  | 35          | 3.5  | 42          | 2.1  | 13          | 1.3  | 29          | 2.9  |
| Urgent Care Centre or Walk-In Centre referral                         | 45          | 1.1  | 26          | 1.3  | 19          | 1.0  | 16          | 0.8  | 4           | 0.4  | 12          | 1.2  | 29          | 1.5  | 22          | 2.2  | 7           | 0.7  |
| Self-presentation, patient instructed to attend by 111 service        | 20          | 0.5  | 7           | 0.4  | 13          | 0.7  | 7           | 0.4  | 2           | 0.2  | 5           | 0.5  | 13          | 0.7  | 5           | 0.5  | 8           | 0.8  |
| Missing                                                               | 10          | 0.3  | 5           | 0.3  | 5           | 0.3  | 5           | 0.3  | 2           | 0.2  | 3           | 0.3  | 5           | 0.3  | 3           | 0.3  | 2           | 0.2  |
| <b>Admission pathway</b>                                              |             |      |             |      |             |      |             |      |             |      |             |      |             |      |             |      |             |      |
| ED / pre-admission area                                               | 3354        | 83.9 | 1757        | 87.9 | 1597        | 79.9 | 1664        | 83.2 | 870         | 87.0 | 794         | 79.4 | 1690        | 84.5 | 887         | 88.7 | 803         | 80.3 |
| Direct admission to acute ward                                        | 451         | 11.3 | 160         | 8.0  | 291         | 14.6 | 247         | 12.4 | 93          | 9.3  | 154         | 15.4 | 204         | 10.2 | 67          | 6.7  | 137         | 13.7 |
| Unable to determine                                                   | 187         | 4.7  | 78          | 3.9  | 109         | 5.5  | 86          | 4.3  | 35          | 3.5  | 51          | 5.1  | 101         | 5.1  | 43          | 4.3  | 58          | 5.8  |
| (blank)                                                               | 8           | 0.2  | 5           | 0.3  | 3           | 0.2  | 3           | 0.2  | 2           | 0.2  | 1           | 0.1  | 5           | 0.3  | 3           | 0.3  | 2           | 0.2  |
| <b>Pre_admission Vital Signs</b>                                      |             |      |             |      |             |      |             |      |             |      |             |      |             |      |             |      |             |      |
| Full set + NEWS calculated                                            | 1765        | 44.1 | 914         | 45.7 | 851         | 42.6 | 761         | 38.1 | 395         | 39.5 | 366         | 36.6 | 1004        | 50.2 | 519         | 51.9 | 485         | 48.5 |
| Full set, no NEWS calculated                                          | 1282        | 32.1 | 656         | 32.8 | 626         | 31.3 | 781         | 39.1 | 391         | 39.1 | 390         | 39.0 | 501         | 25.1 | 265         | 26.5 | 236         | 23.6 |
| Incomplete vital signs                                                | 322         | 8.1  | 160         | 8.0  | 162         | 8.1  | 187         | 9.4  | 91          | 9.1  | 96          | 9.6  | 135         | 6.8  | 69          | 6.9  | 66          | 6.6  |
| No vital signs documented                                             | 365         | 9.1  | 180         | 9.0  | 185         | 9.3  | 133         | 6.7  | 71          | 7.1  | 62          | 6.2  | 232         | 11.6 | 109         | 10.9 | 123         | 12.3 |
| Not applicable: patient not admitted via ED: direct admission to ward | 253         | 6.3  | 81          | 4.1  | 172         | 8.6  | 133         | 6.7  | 48          | 4.8  | 85          | 8.5  | 120         | 6.0  | 33          | 3.3  | 87          | 8.7  |
| Missing                                                               | 13          | 0.3  | 9           | 0.5  | 4           | 0.2  | 5           | 0.3  | 4           | 0.4  | 1           | 0.1  | 8           | 0.4  | 5           | 0.5  | 3           | 0.3  |

ESM Table 3b: Reviewers' assessments of post-admission pathways &amp; care processes

|                                                                                                                       | BOTH EPOCHS |             |            |             |            |             | EPOCH 1    |             |            |             |            |             | EPOCH 2    |             |            |             |            |             |  |
|-----------------------------------------------------------------------------------------------------------------------|-------------|-------------|------------|-------------|------------|-------------|------------|-------------|------------|-------------|------------|-------------|------------|-------------|------------|-------------|------------|-------------|--|
|                                                                                                                       | Total       |             | W/E        |             | W/D        |             | Total      |             | W/E        |             | W/D        |             | Total      |             | W/E        |             | W/D        |             |  |
|                                                                                                                       | n           | %           | n          | %           | n          | %           | n          | %           | n          | %           | n          | %           | n          | %           | n          | %           | n          | %           |  |
| Total                                                                                                                 | 4000        |             | 2000       |             | 2000       |             | 2000       |             | 1000       |             | 1000       |             | 2000       |             | 1000       |             | 1000       |             |  |
| <b>1st location post admission</b>                                                                                    |             |             |            |             |            |             |            |             |            |             |            |             |            |             |            |             |            |             |  |
| Acute Medical Unit (AMU/MAU)                                                                                          | 1401        | 35.0        | 690        | 34.5        | 711        | 35.6        | 704        | 35.2        | 327        | 32.7        | 377        | 37.7        | 697        | 34.9        | 363        | 36.3        | 334        | 33.4        |  |
| Unable to determine ward type                                                                                         | 655         | 16.4        | 319        | 16.0        | 336        | 16.8        | 317        | 15.9        | 164        | 16.4        | 153        | 15.3        | 338        | 16.9        | 155        | 15.5        | 183        | 18.3        |  |
| Clinical Decision Unit or short stay ward                                                                             | 659         | 16.5        | 356        | 17.8        | 303        | 15.2        | 353        | 17.7        | 187        | 18.7        | 166        | 16.6        | 306        | 15.3        | 169        | 16.9        | 137        | 13.7        |  |
| Other (please specify):                                                                                               | 422         | 10.6        | 196        | 9.8         | 226        | 11.3        | 200        | 10.0        | 103        | 10.3        | 97         | 9.7         | 222        | 11.1        | 93         | 9.3         | 129        | 12.9        |  |
| General Surgery (including surgical assessment/operating theatre)                                                     | 376         | 9.4         | 193        | 9.7         | 183        | 9.2         | 179        | 9.0         | 99         | 9.9         | 80         | 8.0         | 197        | 9.9         | 94         | 9.4         | 103        | 10.3        |  |
| Medical sub-specialities including high care (eg: Coronary Care Unit, Renal Unit, Respiratory, Haematology, Oncology) | 215         | 5.4         | 103        | 5.2         | 112        | 5.6         | 116        | 5.8         | 47         | 4.7         | 69         | 6.9         | 99         | 5.0         | 56         | 5.6         | 43         | 4.3         |  |
| General medical ward                                                                                                  | 171         | 4.3         | 84         | 4.2         | 87         | 4.4         | 88         | 4.4         | 47         | 4.7         | 41         | 4.1         | 83         | 4.2         | 37         | 3.7         | 46         | 4.6         |  |
| Older Peoples Medicine/Elderly Care Unit                                                                              | 46          | 1.2         | 27         | 1.4         | 19         | 1.0         | 19         | 1.0         | 11         | 1.1         | 8          | 0.8         | 27         | 1.4         | 16         | 1.6         | 11         | 1.1         |  |
| Critical Care Unit / Intensive Care Unit (including High Dependency)                                                  | 33          | 0.8         | 20         | 1.0         | 13         | 0.7         | 18         | 0.9         | 11         | 1.1         | 7          | 0.7         | 15         | 0.8         | 9          | 0.9         | 6          | 0.6         |  |
| Missing                                                                                                               | 18          | 0.5         | 10         | 0.5         | 8          | 0.4         | 5          | 0.3         | 3          | 0.3         | 2          | 0.2         | 13         | 0.7         | 7          | 0.7         | 6          | 0.6         |  |
| Rehabilitation                                                                                                        | 4           | 0.1         | 2          | 0.1         | 2          | 0.1         | 1          | 0.1         | 1          | 0.1         | 0          | 0.0         | 3          | 0.2         | 1          | 0.1         | 2          | 0.2         |  |
| <b>Location appropriateness</b>                                                                                       |             |             |            |             |            |             |            |             |            |             |            |             |            |             |            |             |            |             |  |
| Yes, definitely appropriate                                                                                           | 2469        | 61.7        | 1215       | 60.8        | 1254       | 62.7        | 1234       | 61.7        | 602        | 60.2        | 632        | 63.2        | 1235       | 61.8        | 613        | 61.3        | 622        | 62.2        |  |
| Probably appropriate                                                                                                  | 854         | 21.4        | 443        | 22.2        | 411        | 20.6        | 455        | 22.8        | 235        | 23.5        | 220        | 22.0        | 399        | 20.0        | 208        | 20.8        | 191        | 19.1        |  |
| Unable to determine                                                                                                   | 534         | 13.4        | 270        | 13.5        | 264        | 13.2        | 240        | 12.0        | 128        | 12.8        | 112        | 11.2        | 294        | 14.7        | 142        | 14.2        | 152        | 15.2        |  |
| No                                                                                                                    | 118         | 3.0         | 59         | 3.0         | 59         | 3.0         | 61         | 3.1         | 29         | 2.9         | 32         | 3.2         | 57         | 2.9         | 30         | 3.0         | 27         | 2.7         |  |
| Missing                                                                                                               | 25          | 0.6         | 13         | 0.7         | 12         | 0.6         | 10         | 0.5         | 6          | 0.6         | 4          | 0.4         | 15         | 0.8         | 7          | 0.7         | 8          | 0.8         |  |
| <b>Post admission Vital Signs</b>                                                                                     |             |             |            |             |            |             |            |             |            |             |            |             |            |             |            |             |            |             |  |
| Full set + NEWS calculated                                                                                            | 1940        | 48.5        | 1018       | 50.9        | 922        | 46.1        | 910        | 45.5        | 479        | 47.9        | 431        | 43.1        | 1030       | 51.5        | 539        | 53.9        | 491        | 49.1        |  |
| Full set, no NEWS calculated                                                                                          | 780         | 19.5        | 386        | 19.3        | 394        | 19.7        | 493        | 24.7        | 241        | 24.1        | 252        | 25.2        | 287        | 14.4        | 145        | 14.5        | 142        | 14.2        |  |
| Incomplete vital signs                                                                                                | 301         | 7.5         | 147        | 7.4         | 154        | 7.7         | 170        | 8.5         | 83         | 8.3         | 87         | 8.7         | 131        | 6.6         | 64         | 6.4         | 67         | 6.7         |  |
| No vital signs documented                                                                                             | 944         | 23.6        | 432        | 21.6        | 512        | 25.6        | 414        | 20.7        | 189        | 18.9        | 225        | 22.5        | 530        | 26.5        | 243        | 24.3        | 287        | 28.7        |  |
| Missing                                                                                                               | 35          | 0.9         | 17         | 0.9         | 18         | 0.9         | 13         | 0.7         | 8          | 0.8         | 5          | 0.5         | 22         | 1.1         | 9          | 0.9         | 13         | 1.3         |  |
| <b>Initial specialist review*</b>                                                                                     |             |             |            |             |            |             |            |             |            |             |            |             |            |             |            |             |            |             |  |
| Specialist review documented in case record                                                                           | 1897        | 47.4        | 927        | 46.4        | 970        | 48.5        | 904        | 45.2        | 425        | 42.5        | 479        | 47.9        | 993        | 49.7        | 502        | 50.2        | 491        | 49.1        |  |
| Probable specialist review but status of doctor uncertain                                                             | 283         | 7.1         | 160        | 8.0         | 123        | 6.2         | 171        | 8.6         | 97         | 9.7         | 74         | 7.4         | 112        | 5.6         | 63         | 6.3         | 49         | 4.9         |  |
| Unlikely that specialist review occurred                                                                              | 158         | 4.0         | 86         | 4.3         | 72         | 3.6         | 84         | 4.2         | 46         | 4.6         | 38         | 3.8         | 74         | 3.7         | 40         | 4.0         | 34         | 3.4         |  |
| No evidence for specialist review documented                                                                          | 1248        | 31.2        | 639        | 32.0        | 609        | 30.5        | 585        | 29.3        | 319        | 31.9        | 266        | 26.6        | 663        | 33.2        | 320        | 32.0        | 343        | 34.3        |  |
| Specialist review, time not documented, case record suggests > 14 hrs after admission                                 | 61          | 1.5         | 22         | 1.1         | 39         | 2.0         | 41         | 2.1         | 13         | 1.3         | 28         | 2.8         | 20         | 1.0         | 9          | 0.9         | 11         | 1.1         |  |
| Specialist review, time not documented, but case record suggests < 14 hrs after admission                             | 314         | 7.9         | 147        | 7.4         | 167        | 8.4         | 197        | 9.9         | 89         | 8.9         | 108        | 10.8        | 117        | 5.9         | 58         | 5.8         | 59         | 5.9         |  |
| Specialist review documented < 14 hrs                                                                                 | 1049        | 26.2        | 529        | 26.5        | 520        | 26.0        | 474        | 23.7        | 226        | 22.6        | 248        | 24.8        | 575        | 28.8        | 303        | 30.3        | 272        | 27.2        |  |
| Probable specialist review documented < 14 hrs                                                                        | 140         | 3.5         | 78         | 3.9         | 62         | 3.1         | 78         | 3.9         | 47         | 4.7         | 31         | 3.1         | 62         | 3.1         | 31         | 3.1         | 31         | 3.1         |  |
| Documented + probable specialist review < 14hrs                                                                       | 1189        | 29.7        | 607        | 30.4        | 582        | 29.1        | 552        | 27.6        | 273        | 27.3        | 279        | 27.9        | 637        | 31.9        | 334        | 33.4        | 303        | 30.3        |  |
| Missing                                                                                                               | 39          | 1.0         | 19         | 1.0         | 20         | 1.0         | 18         | 0.9         | 11         | 1.1         | 7          | 0.7         | 21         | 1.1         | 8          | 0.8         | 13         | 1.3         |  |
| <b>Palliative care discussed</b>                                                                                      |             |             |            |             |            |             |            |             |            |             |            |             |            |             |            |             |            |             |  |
| No, not required, patient appropriate for full treatment                                                              | 2907        | 72.7        | 1425       | 71.3        | 1482       | 74.1        | 1471       | 73.6        | 718        | 71.8        | 753        | 75.3        | 1436       | 71.8        | 707        | 70.7        | 729        | 72.9        |  |
| No, but would probably have been appropriate to consider some form of treatment limitation                            | 437         | 10.9        | 217        | 10.9        | 220        | 11.0        | 252        | 12.6        | 131        | 13.1        | 121        | 12.1        | 185        | 9.3         | 86         | 8.6         | 99         | 9.9         |  |
| Yes                                                                                                                   | 275         | 6.9         | 163        | 8.2         | 112        | 5.6         | 112        | 5.6         | 70         | 7.0         | 42         | 4.2         | 163        | 8.2         | 93         | 9.3         | 70         | 7.0         |  |
| No, but would definitely have been appropriate to limit treatment                                                     | 239         | 6.0         | 124        | 6.2         | 115        | 5.8         | 129        | 6.5         | 63         | 6.3         | 66         | 6.6         | 110        | 5.5         | 61         | 6.1         | 49         | 4.9         |  |
| DNA/CPR already in place prior to admission                                                                           | 110         | 2.8         | 55         | 2.8         | 55         | 2.8         | 22         | 1.1         | 10         | 1.0         | 12         | 1.2         | 88         | 4.4         | 45         | 4.5         | 43         | 4.3         |  |
| <b>total above 3</b>                                                                                                  | <b>624</b>  | <b>15.6</b> | <b>342</b> | <b>17.1</b> | <b>282</b> | <b>14.1</b> | <b>263</b> | <b>13.2</b> | <b>143</b> | <b>14.3</b> | <b>120</b> | <b>12.0</b> | <b>361</b> | <b>18.1</b> | <b>199</b> | <b>19.9</b> | <b>162</b> | <b>16.2</b> |  |
| Missing                                                                                                               | 32          | 0.8         | 16         | 0.8         | 16         | 0.8         | 14         | 0.7         | 8          | 0.8         | 6          | 0.6         | 18         | 0.9         | 8          | 0.8         | 10         | 1.0         |  |
| <b>Palliative care decision appropriateness (of those discussed)</b>                                                  |             |             |            |             |            |             |            |             |            |             |            |             |            |             |            |             |            |             |  |
| Yes, appropriate decision                                                                                             | 273         | 99.3        | 162        | 99.4        | 111        | 99.1        | 111        | 99.1        | 70         | 100.0       | 41         | 97.6        | 162        | 99.4        | 92         | 98.9        | 70         | 100.0       |  |
| Yes, but patient might have benefited from escalation                                                                 | 1           | 0.4         | 0          | 0.0         | 1          | 0.9         | 1          | 0.9         | 0          | 0.0         | 1          | 2.4         | 0          | 0.0         | 0          | 0.0         | 0          | 0.0         |  |
| Missing                                                                                                               | 1           | 0.4         | 1          | 0.6         | 0          | 0.0         | 0          | 0.0         | 0          | 0.0         | 0          | 0.0         | 1          | 0.6         | 1          | 1.1         | 0          | 0.0         |  |
| <b>Palliative care referral</b>                                                                                       |             |             |            |             |            |             |            |             |            |             |            |             |            |             |            |             |            |             |  |
| no                                                                                                                    | 3844        | 96.1        | 1912       | 95.6        | 1932       | 96.6        | 1933       | 96.7        | 959        | 95.9        | 974        | 97.4        | 1911       | 95.6        | 953        | 95.3        | 958        | 95.8        |  |
| yes                                                                                                                   | 87          | 2.2         | 51         | 2.6         | 36         | 1.8         | 36         | 1.8         | 23         | 2.3         | 13         | 1.3         | 51         | 2.6         | 28         | 2.8         | 23         | 2.3         |  |
| Missing                                                                                                               | 69          | 1.7         | 37         | 1.9         | 32         | 1.6         | 31         | 1.6         | 18         | 1.8         | 13         | 1.3         | 38         | 1.9         | 19         | 1.9         | 19         | 1.9         |  |
| <b>Admission avoidable</b>                                                                                            |             |             |            |             |            |             |            |             |            |             |            |             |            |             |            |             |            |             |  |
| no                                                                                                                    | 2919        | 73.0        | 1498       | 74.9        | 1421       | 71.1        | 1475       | 73.8        | 749        | 74.9        | 726        | 72.6        | 1444       | 72.2        | 749        | 74.9        | 695        | 69.5        |  |
| possibly                                                                                                              | 783         | 19.6        | 361        | 18.1        | 422        | 21.1        | 388        | 19.4        | 184        | 18.4        | 204        | 20.4        | 395        | 19.8        | 177        | 17.7        | 218        | 21.8        |  |
| yes                                                                                                                   | 269         | 6.7         | 124        | 6.2         | 145        | 7.3         | 127        | 6.4         | 59         | 5.9         | 68         | 6.8         | 142        | 7.1         | 65         | 6.5         | 77         | 7.7         |  |
| Missing                                                                                                               | 29          | 0.7         | 17         | 0.9         | 12         | 0.6         | 10         | 0.5         | 8          | 0.8         | 2          | 0.2         | 19         | 1.0         | 9          | 0.9         | 10         | 1.0         |  |

\*Categories in this section are not mutually exclusive



**ESM Figure 1: Mean number of errors identified per case notes by reviewer**

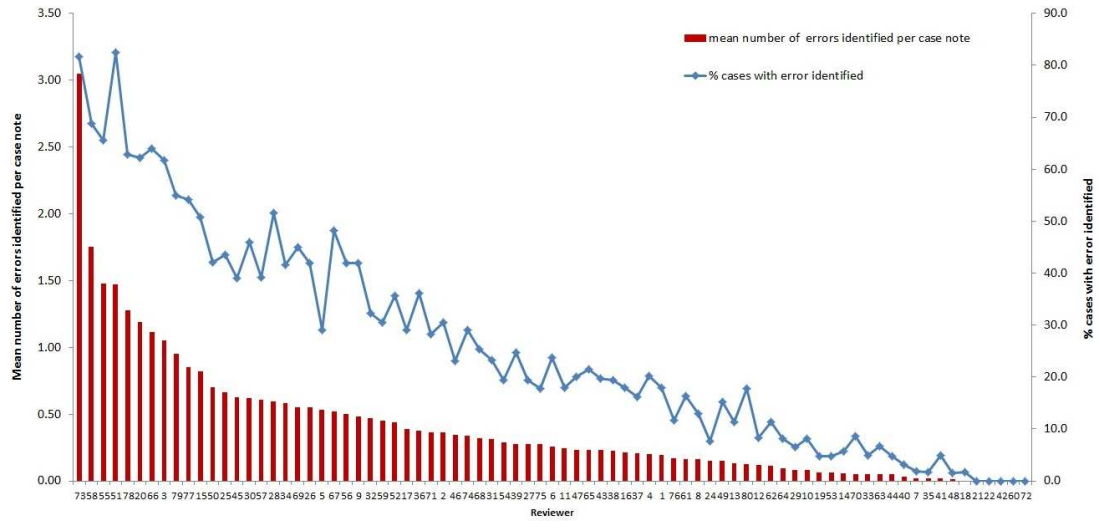

Supplement: bmjqs-2020-011165supp001.pdf [file bmjqs-2020-011165supp001.pdf]
